# Supplementary material
Source: Frontiers journal article supplement (https://www.frontiersin.org/articles/450358)
Supplement: Data_Sheet_2.PDF [file Data_Sheet_2.PDF]

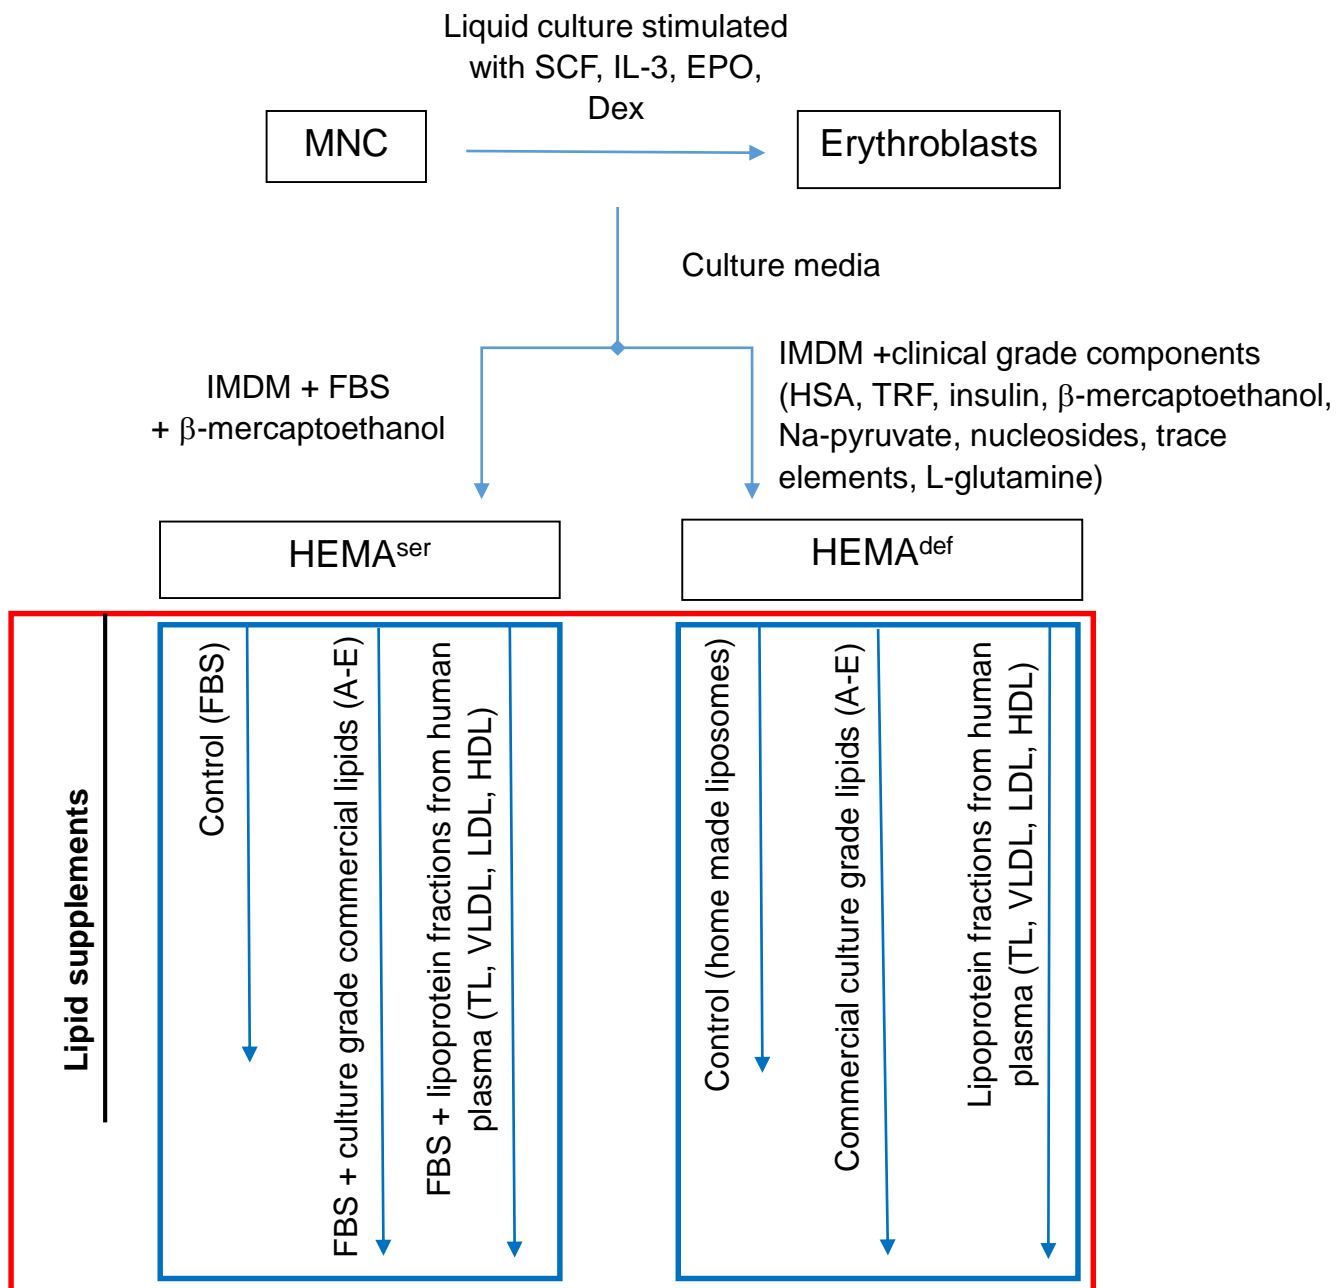

**Figure S2**
