# Supplementary material
Source: Frontiers journal article supplement (https://www.frontiersin.org/articles/450358)
Supplement: Table_1.pdf [file Table_1.pdf]

**Table S1: list of end-points used in the paper and of the corresponding biological implications.**

| <b>Biological events</b>                                                     | <b>End-point/ Assay</b>                                                                                |
|------------------------------------------------------------------------------|--------------------------------------------------------------------------------------------------------|
| <b>Cell metabolism and membrane homeostasis</b>                              | <b>Expression profiling</b>                                                                            |
| <b>Total expansion of erythroid cells</b>                                    | <b>Fold increase of cells in liquid culture over time</b>                                              |
| <b>Number of progenitors recruited in the maturation process</b>             | <b>Colony formation<br/>Semisolid cultures of primary cells</b>                                        |
| <b>Generation/survival of progenitor cells in liquid culture</b>             | <b>Number of progenitor cells in liquid culture<br/>Semisolid cultures of cultured cells over time</b> |
| <b>Proliferation potential of erythroblasts at day 10 of liquid culture</b>  | <b>Proliferation rates of day 10 erythroblasts<br/>MTT assay</b>                                       |
| <b>Apoptotic susceptibility of erythroblasts at day 10 of liquid culture</b> | <b>Apoptotic rates<br/>Acrydine Orange after growth factor starvation</b>                              |
| <b>Progress of the cultured erythroblasts along the maturation pathway</b>   | <b>Flow cytometry for CD36/CD235a expression<br/>Maturation profile of cultured cells over time</b>    |
