# Supplementary material
Source: Frontiers journal article supplement (https://www.frontiersin.org/articles/450358)
Supplement: Table_2.pdf [file Table_2.pdf]

**Table S2: Protein and lipid content of the lipoprotein fractions purified from human plasma used in the study.** The expected protein/lipid and CH/TG ratios in each fraction on the basis of published data (30) is reported in brackets for comparison.

| Plasma Fractions | Density (g/mL) | Content (µg/mL) |           |           | Ratios             |             |
|------------------|----------------|-----------------|-----------|-----------|--------------------|-------------|
|                  |                | Proteins        | CH*       | TG*       | Proteins / (CH+TG) | CH/TG       |
| TL               | 1.21           | 24.00           | 4.40      | 2.87      | 3.30               | 1.53        |
| VLDL             | 1.006-1.019    | 5.70 [8]        | 0.69 [20] | 1.92 [55] | 2.18 [0.11]        | 0.36 [0.36] |
| LDL              | 1.063          | 17.40 [20]      | 2.86 [50] | 1.01 [6]  | 4.50 [0.36]        | 2.83 [8.33] |
| HDL              | 1.21           | 7.10 [50]       | 2.87 [20] | 1.15 [4]  | 1.77 [2.08]        | 2.50 [5.00] |

\* CH= Cholesterol; TG=triglycerides
