# Supplementary material
Source: Frontiers journal article supplement (https://www.frontiersin.org/articles/450358)
Supplement: Table_3.pdf [file Table_3.pdf]

**Table S3: Comparison of the composition of the home made and Sigma LDL fractions.**

| Plasma Fractions                  | Composition |        |
|-----------------------------------|-------------|--------|
|                                   | Proteins    | Lipids |
| Home made LDL*                    | 82%         | 18%    |
| LDL Sigma**<br>(cat. no. LP2-2MG) | 22-20%      | 78-80% |

\* The calculation was made by considering as 100%:  
 $2.86 \text{ CH} + 1.01 \text{ TG} + 17.40 \text{ Proteins} = 21.27 \text{ } [\mu\text{g/mL}]$

\*\* The composition of LDL Sigma is from:

<https://www.sigmaaldrich.com/catalog/product/mm/lp2?lang=it&region=IT>
